# Supplementary material for: A general method to fabricate MoO3/C composites and porous C for asymmetric solid-state supercapacitors
Source: Royal Society of Chemistry journal article supplement (doi:10.1039/c8ra10232e), 2019-01-01
Supplement: c8ra10232e1.pdf [file c8ra10232e1.pdf]

## Supplementary material

### A general method to fabricate 3D net-like MoO<sub>3</sub>/C composite and porous C for Asymmetric Solid-State Supercapacitors

Yu Jiang<sup>a</sup>, Xuemin Yan<sup>a,\*</sup>, Yapeng Cheng<sup>a</sup>, Yan Zhang<sup>a</sup>, Wei Xiao<sup>a</sup>, Lu Gan<sup>c</sup>, Haolin

Tang<sup>b,\*</sup>

<sup>a</sup> College of Chemistry and Environmental Engineering, Yangtze University, Jingzhou 434023, Hubei, China.

<sup>b</sup> State Key Laboratory of Advanced Technology for Materials Synthesis and Processing, Wuhan University of Technology, Wuhan 430070, PR China

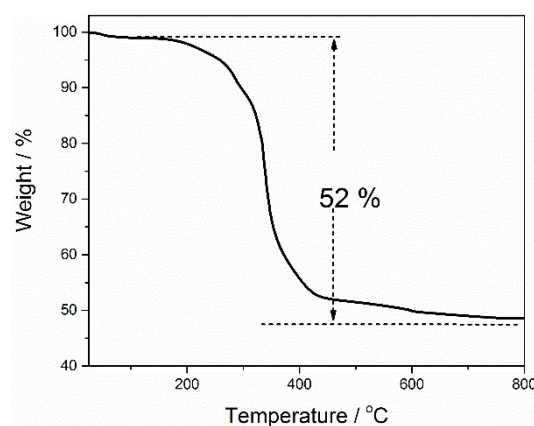

Figure S1. TGA curve of the hydrogel at a heating rate of 10 C min<sup>-1</sup> under the nitrogen atmosphere.

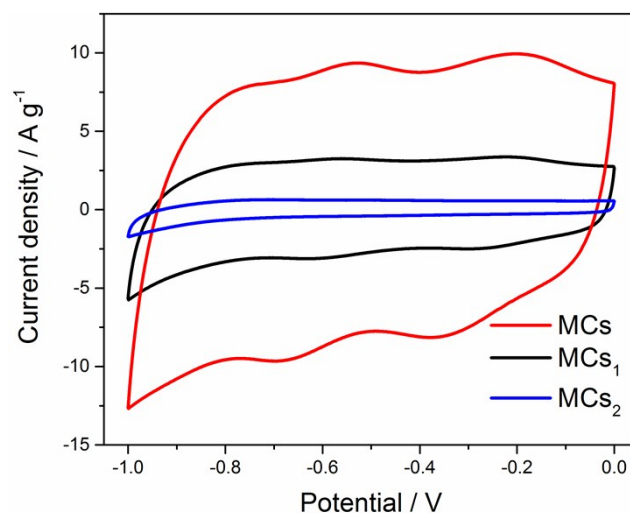

Figure S2. CV curves of the MCs, MCs<sub>1</sub>, MCs<sub>2</sub> at the scan rate of 50 mV s<sup>-1</sup>.

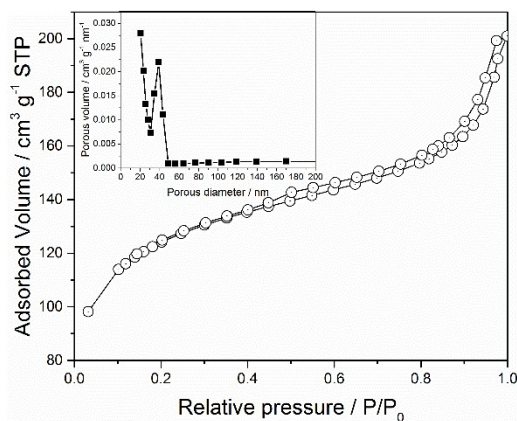

Figure S3. N<sub>2</sub> adsorption–desorption isotherms of the MCs. The inset picture corresponds to the BJH porous distribution of the MCs.

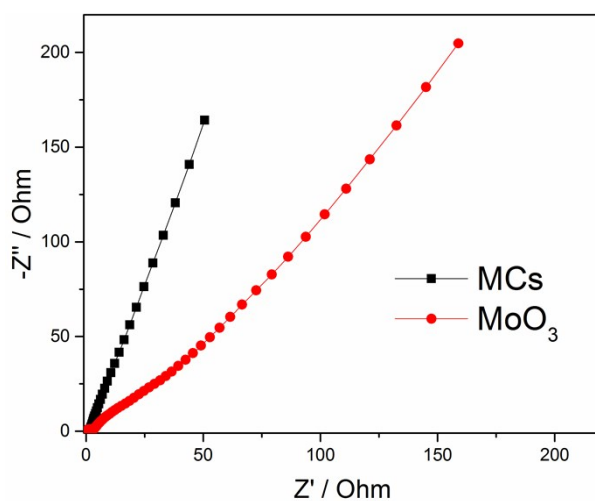

Figure S4. Nyquist plots of MCs and MoO<sub>3</sub>. MoO<sub>3</sub> was fabricated by of decomposition of phosphomolybdic acidhydrate without presence of polymer matrix.

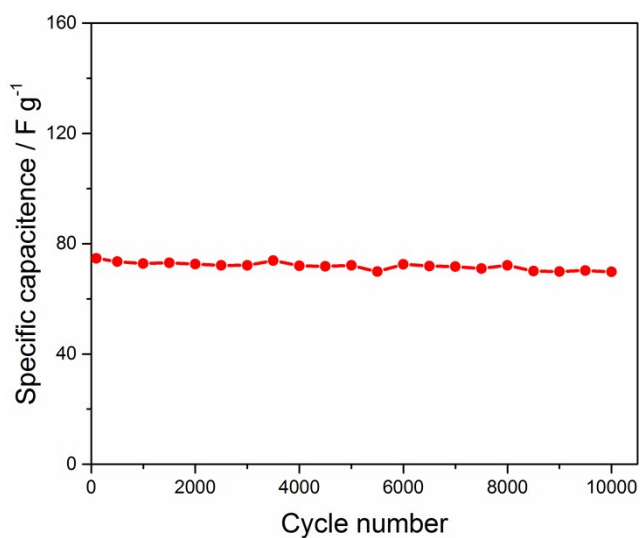

Figure S5. Cycling life test of the PC at a current density of 10 A g<sup>-1</sup>.

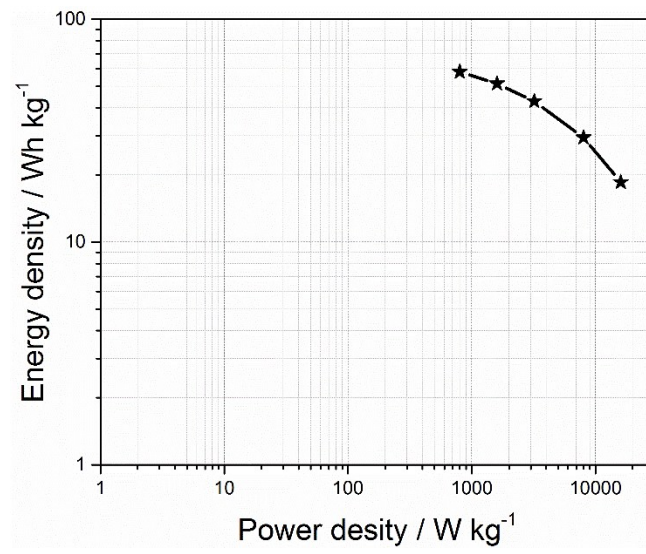

Figure S6. Ragone plots of the obtained MCs.
